# Supplementary material for: A naturally occurring bovine APOBEC3 confers resistance to bovine lentiviruses: implication for the co-evolution of bovids and their lentiviruses
Source: PubMed Central journal article supplement (PMC5036201; doi:10.1038/srep33988), 2016-09-26
Supplement: srep33988-s1.pdf [file srep33988-s1.pdf]

## **A naturally occurring bovine APOBEC3 confers resistance to bovine lentiviruses: implication for the co-evolution of bovids and their lentiviruses**

Eri Yamada, Rokusuke Yoshikawa, Yusuke Nakano, Naoko Misawa, Tomoko Kobayashi, Fengrong Ren, Taisuke Izumi, Takayuki Miyazawa, Yoshio Koyanagi, and Kei Sato.

### **Supplementary Information:**

Supplementary figure 1: Scheme of bovine genome encoding *APOBEC3* and the position of the primers used in this study

Supplementary figure 2: Summary of putative bovine ISRE

Supplementary figure 3: Unrooted phylogenetic tree of all bovine A3 genes

Supplementary figure 4: Identity and similarity of BIV Vif and JDV Vif

Supplementary figure 5: Degradation of bovine APOBEC3Z2Z3 by BIV Vif and JDV Vif

Supplementary figures 6-9: Original (uncropped) blots

Supplementary tables 1-3: Summary of site model analyses on bovine APOBEC3Z1-Z3

Supplementary table 4: Primers used for bovine APOBEC3 and CYTB sequencing

Supplementary table 5: Primers used for the construction of bovine APOBEC3Z3 expression plasmids

Supplementary table 6: Primers used for the construction of bovine APOBEC3 MRCA expression plasmids

Supplementary table 7: Primers used for the construction of expression plasmids for BIV/JDV Vif derivatives

*Bos taurus* Chromosome 5 (NC\_007303.5) 117020001-11709000

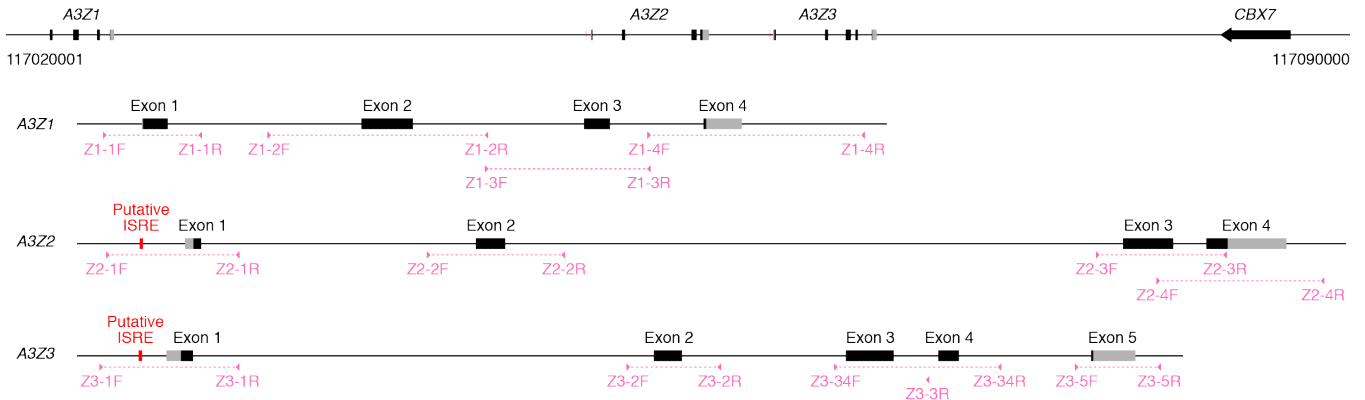

**Supplementary Figure 1. Scheme of bovine genome encoding *APOBEC3* and the position of the primers used in this study – Related to Figure 1.**

The scheme of *Bos taurus* chromosome 5 including the exons of bovine *APOBEC3Z1*, *Z2*, and *Z3* is shown. The primers used for PCR/sequencing are shown in pink arrowheads, and the names are identical to those in **Supplementary table 4**.

|                | A3Z2 putative ISRE   | A3Z3 putative ISRE   |
|----------------|----------------------|----------------------|
| Cattle         | TTTACTTTCTCTTTCCCTTT | TTTACTTTCTCTTTCCCCTT |
| Zebu           | .....                | .....                |
| European bison | .....                | .....                |
| Banteng        | .....                | .....                |
| Gaur           | .....                | .....                |
| American bison | .....                | .....                |
| Yak            | .....                | .....                |
| Water buffalo  | .....                | .....G.....          |

**Supplementary Figure 2. Summary of putative bovine ISRE.**

The sequence of putative ISRE of each bovid, which is indicated by red in **Supplementary figure 1**, is summarized.

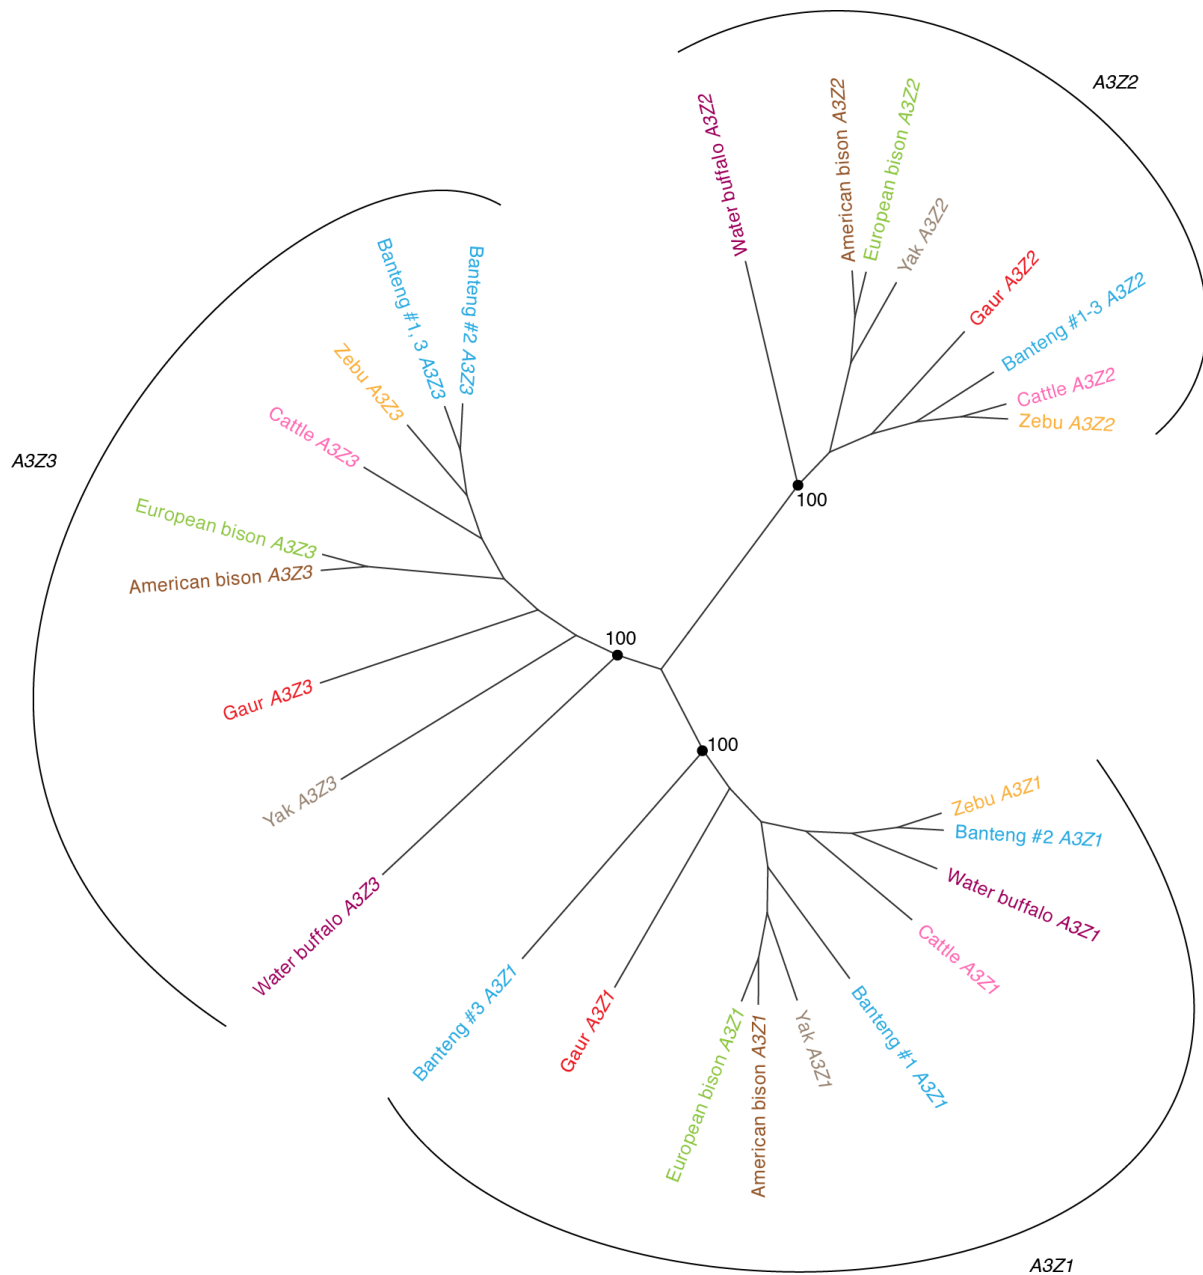

**Supplementary Figure 3. Unrooted phylogenetic tree of all bovine A3 genes.** Phylogenetic tree of all bovine A3 genes reconstructed using ML method. The bootstrap value for each cluster (indicated with black dot) is indicated.

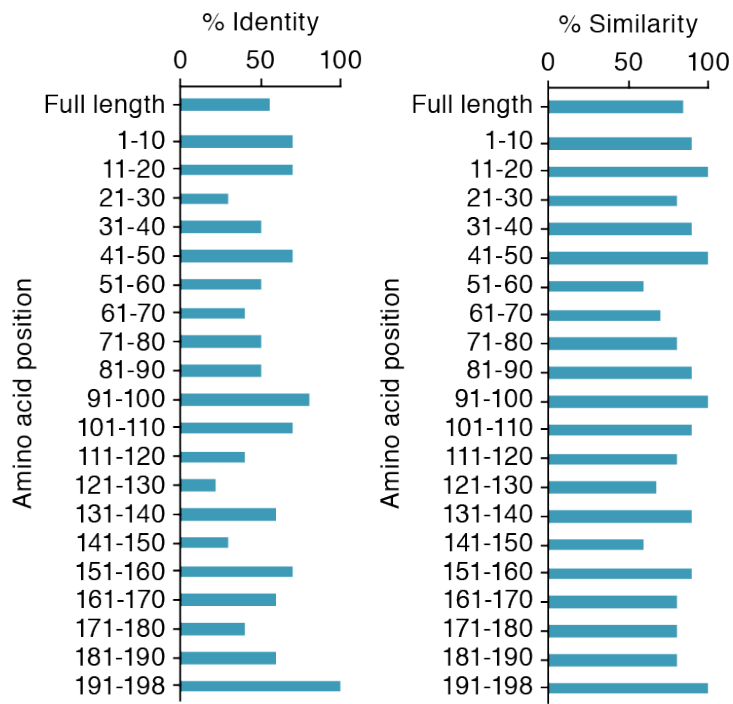

**Supplementary Figure 4. Identity and similarity of BIV Vif and JDV Vif – Related to Figure 4.**  
 The identity (left) and similarity (right) of BIV/JDV Vif is summarized.

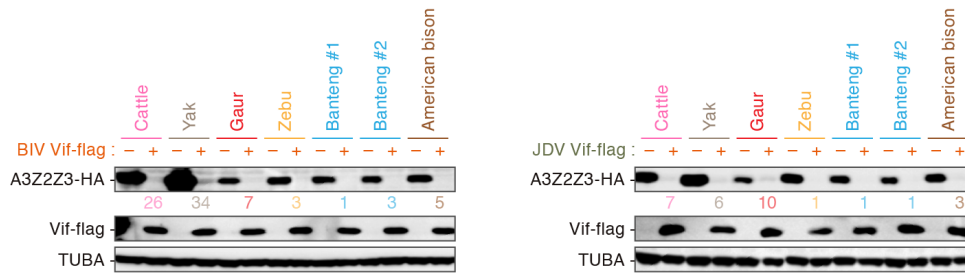

### Supplementary Figure 5. Degradation of bovine APOBEC3Z2Z3 by BIV Vif and JDV Vif.

The HA-tagged expression plasmids for bovine APOBEC3Z2Z3 (150 ng) was co-transfected with the flag-tagged expression plasmid for either BIV Vif or JDV Vif (1,000 ng). Representative results of Western blotting are shown. The value under the band of respective bovine A3Z2Z3-HA represents the percentage of band intensity compared to the absence of Vif. Blots have been cropped; full uncropped blots are available as **Supplementary figure 7**.

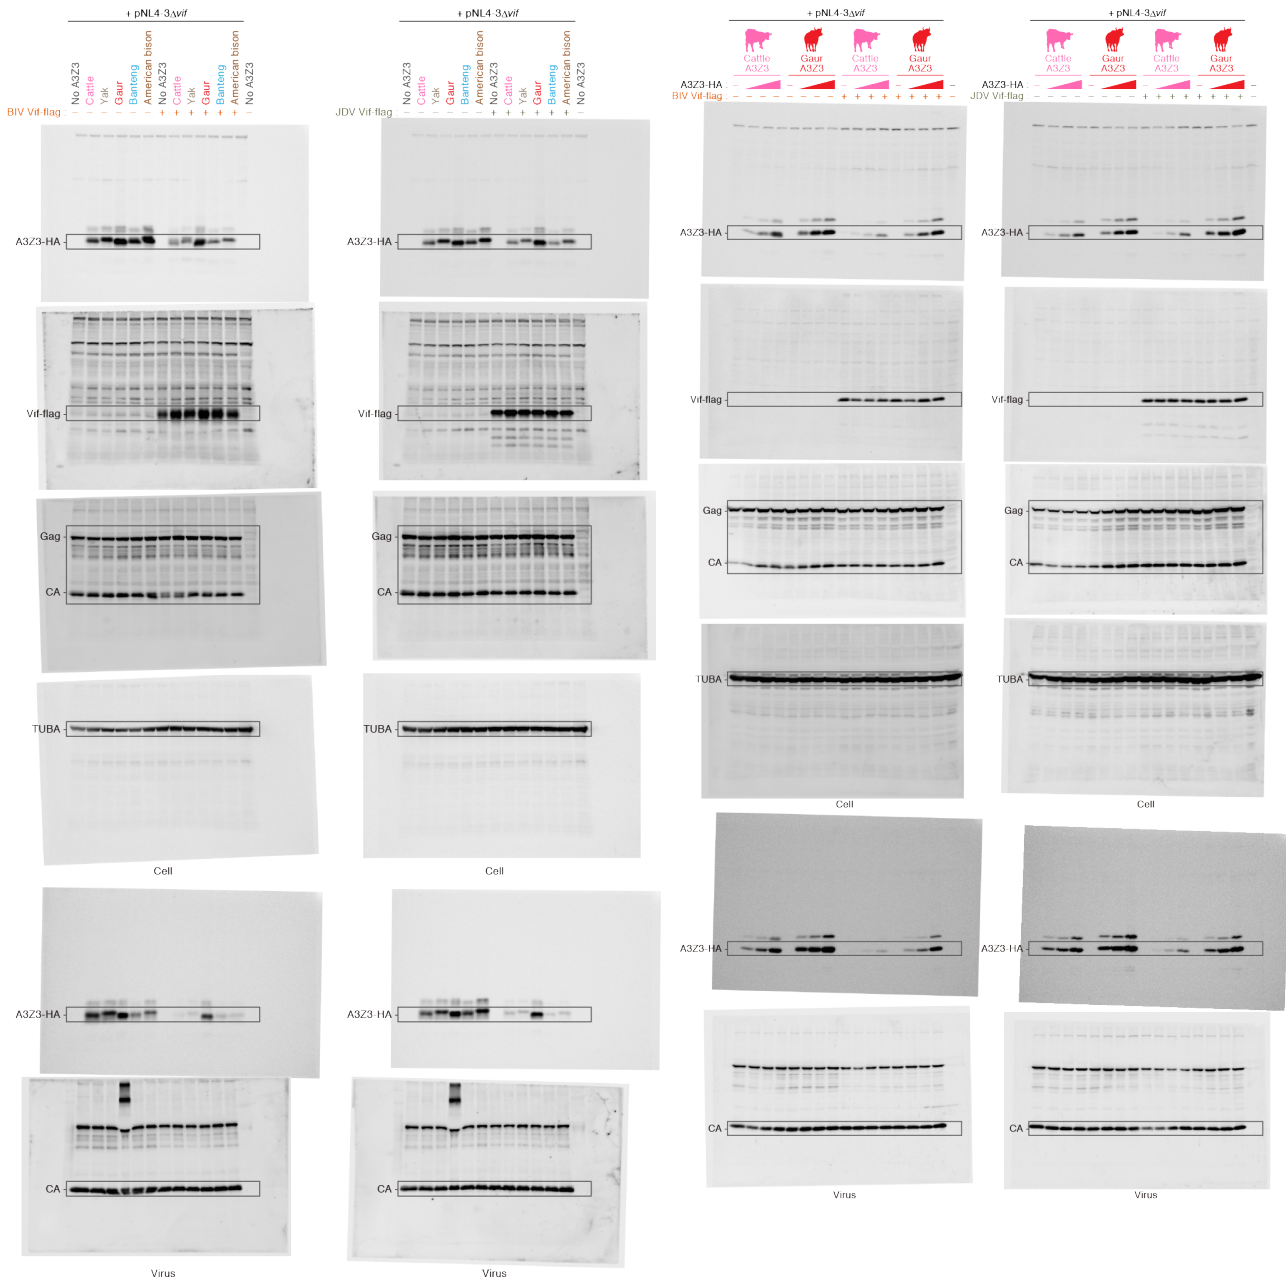

Supplementary Figure 6. Original (uncropped) blots of Figures 3A and 3C.

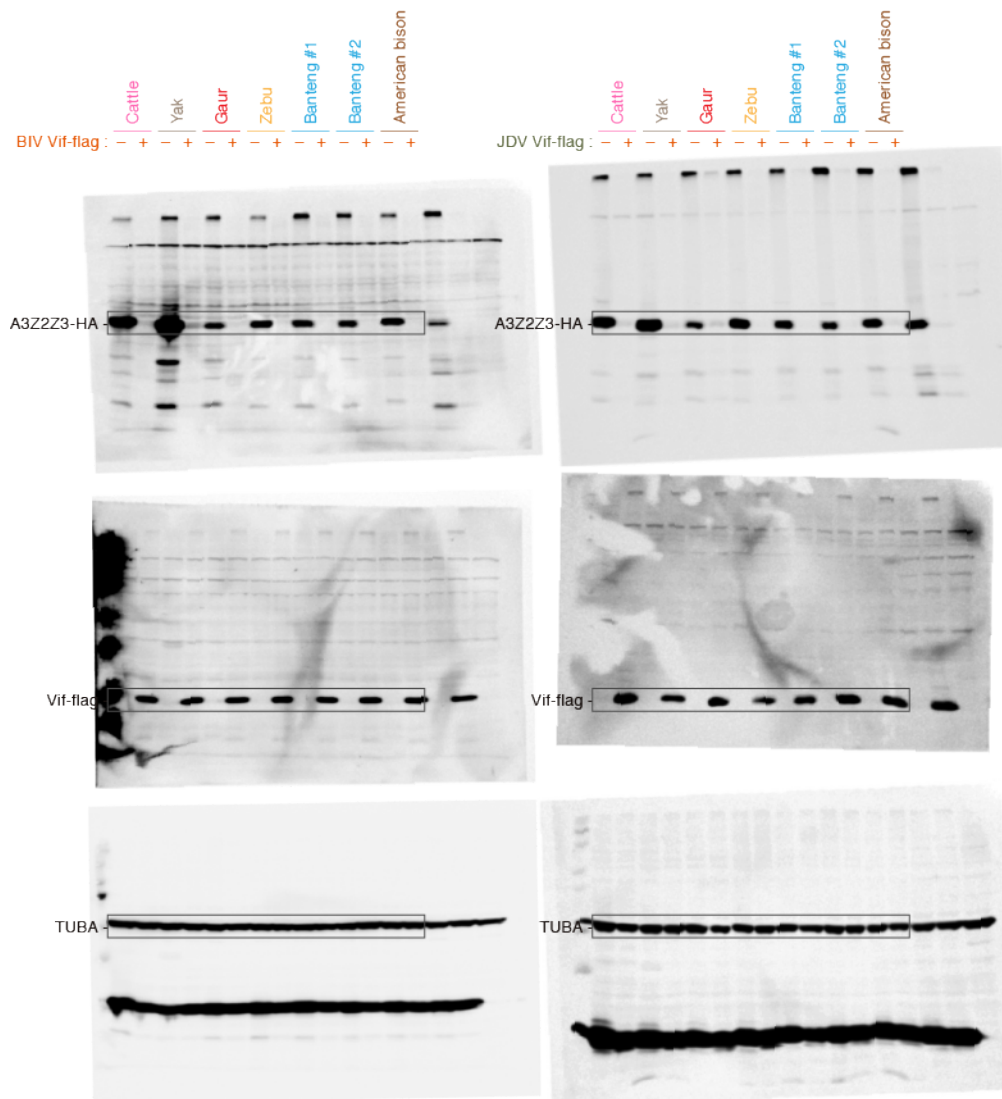

Supplementary Figure 7. Original (uncropped) blots of Supplementary figure 5.



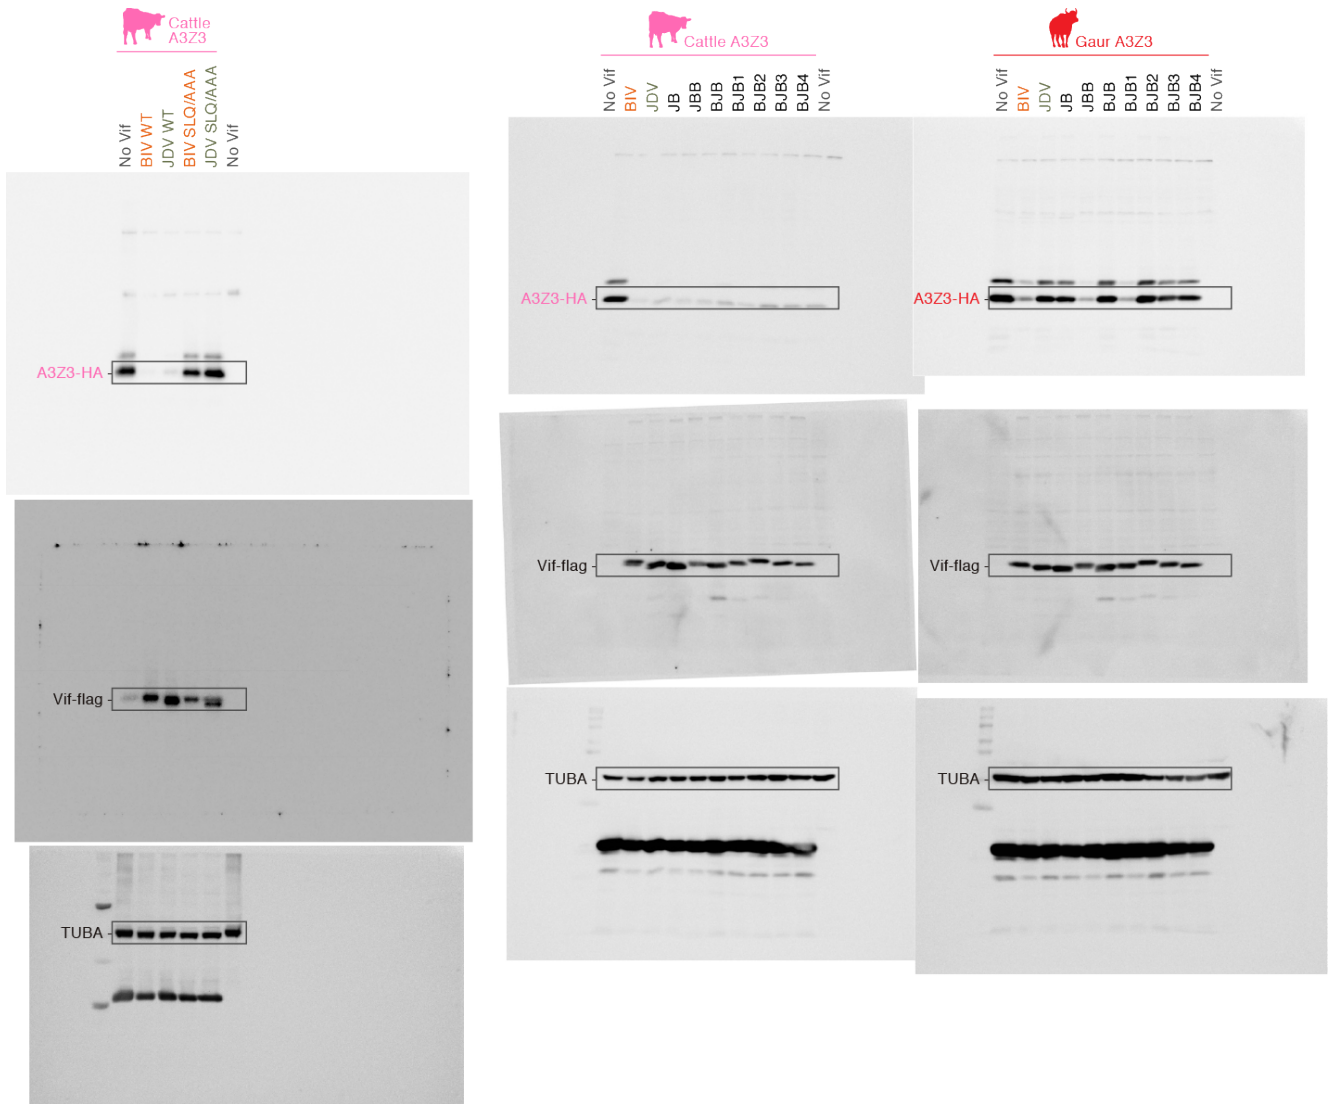

Supplementary Figure 8. Original (uncropped) blots of Figures 4B and 4D.



**Supplementary table 1. Summary of site model analyses on bovine *APOBEC3Z1*.**

| Site | Posterior probability | dN/dS ratio | Site | Posterior probability | dN/dS ratio | Site | Posterior probability | dN/dS ratio |
|------|-----------------------|-------------|------|-----------------------|-------------|------|-----------------------|-------------|
| 1    | 0.19                  | 1.40        | 65   | 0.19                  | 1.40        | 129  | 0.22                  | 1.61        |
| 2    | 0.18                  | 1.28        | 66   | 0.75                  | 5.32        | 130  | 0.23                  | 1.68        |
| 3    | 0.22                  | 1.60        | 67   | 0.22                  | 1.62        | 131  | 0.20                  | 1.48        |
| 4    | 0.21                  | 1.54        | 68   | 0.22                  | 1.60        | 132  | 0.22                  | 1.60        |
| 5    | 0.19                  | 1.41        | 69   | 0.21                  | 1.51        | 133  | 0.19                  | 1.39        |
| 6    | 0.20                  | 1.42        | 70   | 0.22                  | 1.61        | 134  | 0.20                  | 1.41        |
| 7    | 0.22                  | 1.59        | 71   | 0.18                  | 1.28        | 135  | 0.23                  | 1.68        |
| 8    | 0.19                  | 1.36        | 72   | 0.20                  | 1.46        | 136  | 0.19                  | 1.40        |
| 9    | 0.18                  | 1.29        | 73   | 0.21                  | 1.51        | 137  | 0.19                  | 1.41        |
| 10   | 0.20                  | 1.42        | 74   | 0.22                  | 1.56        | 138  | 0.19                  | 1.40        |
| 11   | 0.18                  | 1.29        | 75   | 0.18                  | 1.33        | 139  | 0.19                  | 1.40        |
| 12   | 0.21                  | 1.51        | 76   | 0.18                  | 1.32        | 140  | 0.19                  | 1.41        |
| 13   | 0.23                  | 1.68        | 77   | 0.19                  | 1.37        | 141  | 0.22                  | 1.60        |
| 14   | 0.77                  | 5.43        | 78   | 0.20                  | 1.44        | 142  | 0.19                  | 1.36        |
| 15   | 0.96                  | 6.72        | 79   | 0.19                  | 1.41        | 143  | 0.18                  | 1.28        |
| 16   | 0.22                  | 1.61        | 80   | 0.22                  | 1.56        | 144  | 0.22                  | 1.60        |
| 17   | 0.74                  | 5.22        | 81   | 0.20                  | 1.42        | 145  | 0.19                  | 1.37        |
| 18   | 0.19                  | 1.37        | 82   | 0.19                  | 1.40        | 146  | 0.18                  | 1.33        |
| 19   | 0.19                  | 1.41        | 83   | 0.20                  | 1.45        | 147  | 0.19                  | 1.35        |
| 20   | 0.18                  | 1.32        | 84   | 0.22                  | 1.60        | 148  | 0.22                  | 1.60        |
| 21   | 0.22                  | 1.61        | 85   | 0.18                  | 1.29        | 149  | 0.22                  | 1.60        |
| 22   | 0.19                  | 1.35        | 86   | 0.20                  | 1.43        | 150  | 0.19                  | 1.41        |
| 23   | 0.18                  | 1.32        | 87   | 0.22                  | 1.56        | 151  | 0.20                  | 1.42        |
| 24   | 0.19                  | 1.36        | 88   | 0.18                  | 1.32        | 152  | 0.20                  | 1.47        |
| 25   | 0.74                  | 5.20        | 89   | 0.21                  | 1.50        | 153  | 0.18                  | 1.28        |
| 26   | 0.19                  | 1.36        | 90   | 0.22                  | 1.56        | 154  | 0.18                  | 1.33        |
| 27   | 0.19                  | 1.37        | 91   | 0.20                  | 1.41        | 155  | 0.19                  | 1.37        |
| 28   | 0.22                  | 1.61        | 92   | 0.22                  | 1.56        | 156  | 0.23                  | 1.64        |
| 29   | 0.18                  | 1.28        | 93   | 0.22                  | 1.60        | 157  | 0.22                  | 1.60        |
| 30   | 0.20                  | 1.43        | 94   | 0.22                  | 1.61        | 158  | 0.20                  | 1.43        |
| 31   | 0.69                  | 4.88        | 95   | 0.22                  | 1.59        | 159  | 0.22                  | 1.60        |
| 32   | 0.22                  | 1.60        | 96   | 0.23                  | 1.67        | 160  | 0.22                  | 1.56        |
| 33   | 0.20                  | 1.47        | 97   | 0.20                  | 1.42        | 161  | 0.20                  | 1.43        |
| 34   | 0.19                  | 1.40        | 98   | 0.23                  | 1.63        | 162  | 0.22                  | 1.60        |
| 35   | 0.22                  | 1.61        | 99   | 0.19                  | 1.37        | 163  | 0.19                  | 1.36        |
| 36   | 0.22                  | 1.61        | 100  | 0.19                  | 1.36        | 164  | 0.19                  | 1.39        |
| 37   | 0.18                  | 1.28        | 101  | 0.18                  | 1.29        | 165  | 0.24                  | 1.73        |
| 38   | 0.19                  | 1.36        | 102  | 0.71                  | 4.97        | 166  | 0.21                  | 1.51        |
| 39   | 0.18                  | 1.32        | 103  | 0.18                  | 1.33        | 167  | 0.23                  | 1.67        |
| 40   | 0.19                  | 1.37        | 104  | 0.21                  | 1.50        | 168  | 0.19                  | 1.37        |
| 41   | 0.18                  | 1.32        | 105  | 0.18                  | 1.29        | 169  | 0.21                  | 1.52        |
| 42   | 0.22                  | 1.60        | 106  | 0.22                  | 1.61        | 170  | 0.22                  | 1.56        |
| 43   | 0.20                  | 1.47        | 107  | 0.18                  | 1.33        | 171  | 0.21                  | 1.50        |
| 44   | 0.18                  | 1.33        | 108  | 0.19                  | 1.40        | 172  | 0.20                  | 1.44        |
| 45   | 0.18                  | 1.29        | 109  | 0.22                  | 1.61        | 173  | 0.22                  | 1.56        |
| 46   | 0.19                  | 1.37        | 110  | 0.20                  | 1.41        | 174  | 0.75                  | 5.27        |
| 47   | 0.21                  | 1.54        | 111  | 0.20                  | 1.45        | 175  | 0.22                  | 1.60        |
| 48   | 0.23                  | 1.65        | 112  | 0.18                  | 1.33        | 176  | 0.22                  | 1.61        |
| 49   | 0.75                  | 5.27        | 113  | 0.19                  | 1.40        | 177  | 0.22                  | 1.56        |
| 50   | 0.23                  | 1.68        | 114  | 0.21                  | 1.54        | 178  | 0.20                  | 1.41        |
| 51   | 0.21                  | 1.51        | 115  | 0.19                  | 1.41        | 179  | 0.22                  | 1.58        |
| 52   | 0.19                  | 1.36        | 116  | 0.95                  | 6.64        | 180  | 0.20                  | 1.44        |
| 53   | 0.96                  | 6.72        | 117  | 0.70                  | 4.94        | 181  | 0.19                  | 1.37        |
| 54   | 0.74                  | 5.22        | 118  | 0.75                  | 5.33        | 182  | 0.22                  | 1.59        |
| 55   | 0.19                  | 1.35        | 119  | 0.22                  | 1.60        | 183  | 0.22                  | 1.56        |
| 56   | 0.21                  | 1.53        | 120  | 0.19                  | 1.39        | 184  | 0.23                  | 1.68        |
| 57   | 0.23                  | 1.67        | 121  | 0.19                  | 1.35        | 185  | 0.18                  | 1.29        |
| 58   | 0.19                  | 1.36        | 122  | 0.21                  | 1.53        |      |                       |             |
| 59   | 0.20                  | 1.44        | 123  | 0.22                  | 1.56        |      |                       |             |
| 60   | 0.18                  | 1.32        | 124  | 0.21                  | 1.52        |      |                       |             |
| 61   | 0.20                  | 1.42        | 125  | 0.18                  | 1.32        |      |                       |             |
| 62   | 0.22                  | 1.61        | 126  | 0.22                  | 1.61        |      |                       |             |
| 63   | 0.23                  | 1.64        | 127  | 0.19                  | 1.35        |      |                       |             |
| 64   | 0.19                  | 1.37        | 128  | 0.22                  | 1.60        |      |                       |             |

**Supplementary table 2. Summary of site model analyses on bovine *APOBEC3Z2*.**

| Site | Posterior probability | dN/dS ratio | Site | Posterior probability | dN/dS ratio | Site | Posterior probability | dN/dS ratio | Site | Posterior probability | dN/dS ratio |
|------|-----------------------|-------------|------|-----------------------|-------------|------|-----------------------|-------------|------|-----------------------|-------------|
| 1    | 0.30                  | 1.74        | 65   | 0.30                  | 1.78        | 129  | 0.29                  | 1.68        | 193  | 0.32                  | 1.87        |
| 2    | 0.32                  | 1.89        | 66   | 0.30                  | 1.76        | 130  | 0.30                  | 1.73        | 194  | 0.33                  | 1.92        |
| 3    | 0.33                  | 1.93        | 67   | 0.32                  | 1.88        | 131  | 0.30                  | 1.73        | 195  | 0.32                  | 1.87        |
| 4    | 0.31                  | 1.78        | 68   | 0.32                  | 1.85        | 132  | 0.30                  | 1.77        | 196  | 0.30                  | 1.74        |
| 5    | 0.29                  | 1.69        | 69   | 0.29                  | 1.66        | 133  | 0.79                  | 4.87        | 197  | 0.33                  | 1.91        |
| 6    | 0.33                  | 1.94        | 70   | 0.31                  | 1.80        | 134  | 0.32                  | 1.90        | 198  | 0.30                  | 1.74        |
| 7    | 0.78                  | 4.81        | 71   | 0.30                  | 1.76        | 135  | 0.30                  | 1.76        | 199  | 0.29                  | 1.66        |
| 8    | 0.29                  | 1.69        | 72   | 0.32                  | 1.89        | 136  | 0.29                  | 1.69        | 200  | 0.32                  | 1.89        |
| 9    | 0.29                  | 1.68        | 73   | 0.81                  | 4.98        | 137  | 0.78                  | 4.80        | 201  | 0.30                  | 1.76        |
| 10   | 0.80                  | 4.90        | 74   | 0.30                  | 1.78        | 138  | 0.30                  | 1.73        | 202  | 0.30                  | 1.78        |
| 11   | 0.30                  | 1.74        | 75   | 0.33                  | 1.92        | 139  | 0.31                  | 1.80        |      |                       |             |
| 12   | 0.30                  | 1.77        | 76   | 0.78                  | 4.81        | 140  | 0.30                  | 1.74        |      |                       |             |
| 13   | 0.31                  | 1.83        | 77   | 0.29                  | 1.69        | 141  | 0.30                  | 1.74        |      |                       |             |
| 14   | 0.30                  | 1.77        | 78   | 0.29                  | 1.66        | 142  | 0.96                  | 5.92        |      |                       |             |
| 15   | 0.32                  | 1.88        | 79   | 0.30                  | 1.77        | 143  | 0.30                  | 1.77        |      |                       |             |
| 16   | 0.29                  | 1.66        | 80   | 0.32                  | 1.87        | 144  | 0.30                  | 1.75        |      |                       |             |
| 17   | 0.30                  | 1.77        | 81   | 0.30                  | 1.76        | 145  | 0.31                  | 1.80        |      |                       |             |
| 18   | 0.29                  | 1.68        | 82   | 0.29                  | 1.71        | 146  | 0.30                  | 1.78        |      |                       |             |
| 19   | 0.32                  | 1.87        | 83   | 0.30                  | 1.73        | 147  | 0.32                  | 1.87        |      |                       |             |
| 20   | 0.29                  | 1.66        | 84   | 0.32                  | 1.87        | 148  | 0.30                  | 1.76        |      |                       |             |
| 21   | 0.30                  | 1.74        | 85   | 0.33                  | 1.92        | 149  | 0.30                  | 1.75        |      |                       |             |
| 22   | 0.33                  | 1.93        | 86   | 0.31                  | 1.83        | 150  | 0.32                  | 1.87        |      |                       |             |
| 23   | 0.31                  | 1.79        | 87   | 0.30                  | 1.73        | 151  | 0.29                  | 1.68        |      |                       |             |
| 24   | 0.33                  | 1.94        | 88   | 0.77                  | 4.73        | 152  | 0.29                  | 1.66        |      |                       |             |
| 25   | 0.32                  | 1.85        | 89   | 0.31                  | 1.78        | 153  | 0.31                  | 1.80        |      |                       |             |
| 26   | 0.33                  | 1.92        | 90   | 0.30                  | 1.74        | 154  | 0.33                  | 1.92        |      |                       |             |
| 27   | 0.32                  | 1.87        | 91   | 0.30                  | 1.73        | 155  | 0.31                  | 1.78        |      |                       |             |
| 28   | 0.30                  | 1.77        | 92   | 0.32                  | 1.87        | 156  | 0.32                  | 1.85        |      |                       |             |
| 29   | 0.30                  | 1.73        | 93   | 0.29                  | 1.71        | 157  | 0.31                  | 1.81        |      |                       |             |
| 30   | 0.29                  | 1.69        | 94   | 0.81                  | 5.00        | 158  | 0.29                  | 1.66        |      |                       |             |
| 31   | 0.30                  | 1.73        | 95   | 0.29                  | 1.66        | 159  | 0.32                  | 1.89        |      |                       |             |
| 32   | 0.31                  | 1.80        | 96   | 0.30                  | 1.74        | 160  | 0.30                  | 1.74        |      |                       |             |
| 33   | 0.32                  | 1.88        | 97   | 0.32                  | 1.90        | 161  | 0.30                  | 1.77        |      |                       |             |
| 34   | 0.96                  | 5.91        | 98   | 0.29                  | 1.69        | 162  | 0.29                  | 1.69        |      |                       |             |
| 35   | 0.29                  | 1.66        | 99   | 0.29                  | 1.66        | 163  | 0.32                  | 1.89        |      |                       |             |
| 36   | 0.33                  | 1.95        | 100  | 0.30                  | 1.73        | 164  | 0.32                  | 1.87        |      |                       |             |
| 37   | 0.30                  | 1.76        | 101  | 0.30                  | 1.77        | 165  | 0.30                  | 1.73        |      |                       |             |
| 38   | 0.32                  | 1.89        | 102  | 0.31                  | 1.83        | 166  | 0.32                  | 1.86        |      |                       |             |
| 39   | 0.31                  | 1.78        | 103  | 0.30                  | 1.73        | 167  | 0.29                  | 1.69        |      |                       |             |
| 40   | 0.29                  | 1.66        | 104  | 0.30                  | 1.74        | 168  | 0.32                  | 1.87        |      |                       |             |
| 41   | 0.30                  | 1.75        | 105  | 0.33                  | 1.95        | 169  | 0.31                  | 1.83        |      |                       |             |
| 42   | 0.30                  | 1.75        | 106  | 0.31                  | 1.83        | 170  | 0.32                  | 1.86        |      |                       |             |
| 43   | 0.29                  | 1.66        | 107  | 0.29                  | 1.68        | 171  | 0.30                  | 1.73        |      |                       |             |
| 44   | 0.29                  | 1.69        | 108  | 0.30                  | 1.77        | 172  | 0.32                  | 1.88        |      |                       |             |
| 45   | 0.79                  | 4.87        | 109  | 0.29                  | 1.69        | 173  | 0.33                  | 1.92        |      |                       |             |
| 46   | 0.32                  | 1.89        | 110  | 0.30                  | 1.74        | 174  | 0.77                  | 4.75        |      |                       |             |
| 47   | 0.30                  | 1.73        | 111  | 0.30                  | 1.73        | 175  | 0.32                  | 1.86        |      |                       |             |
| 48   | 0.29                  | 1.69        | 112  | 0.32                  | 1.87        | 176  | 0.31                  | 1.80        |      |                       |             |
| 49   | 0.29                  | 1.69        | 113  | 0.31                  | 1.83        | 177  | 0.31                  | 1.81        |      |                       |             |
| 50   | 0.30                  | 1.73        | 114  | 0.30                  | 1.73        | 178  | 0.30                  | 1.75        |      |                       |             |
| 51   | 0.31                  | 1.81        | 115  | 0.30                  | 1.74        | 179  | 0.30                  | 1.77        |      |                       |             |
| 52   | 0.32                  | 1.87        | 116  | 0.31                  | 1.81        | 180  | 0.30                  | 1.73        |      |                       |             |
| 53   | 0.32                  | 1.88        | 117  | 0.33                  | 1.92        | 181  | 0.30                  | 1.75        |      |                       |             |
| 54   | 0.30                  | 1.75        | 118  | 0.29                  | 1.66        | 182  | 0.33                  | 1.92        |      |                       |             |
| 55   | 0.32                  | 1.86        | 119  | 0.30                  | 1.73        | 183  | 0.31                  | 1.83        |      |                       |             |
| 56   | 0.29                  | 1.69        | 120  | 0.32                  | 1.87        | 184  | 0.30                  | 1.73        |      |                       |             |
| 57   | 0.29                  | 1.66        | 121  | 0.30                  | 1.78        | 185  | 0.32                  | 1.86        |      |                       |             |
| 58   | 0.33                  | 1.95        | 122  | 0.30                  | 1.75        | 186  | 0.33                  | 1.95        |      |                       |             |
| 59   | 0.32                  | 1.90        | 123  | 0.29                  | 1.66        | 187  | 0.29                  | 1.69        |      |                       |             |
| 60   | 0.79                  | 4.87        | 124  | 0.31                  | 1.80        | 188  | 0.32                  | 1.88        |      |                       |             |
| 61   | 0.30                  | 1.77        | 125  | 0.31                  | 1.84        | 189  | 0.31                  | 1.84        |      |                       |             |
| 62   | 0.30                  | 1.73        | 126  | 0.31                  | 1.81        | 190  | 0.32                  | 1.89        |      |                       |             |
| 63   | 0.29                  | 1.66        | 127  | 0.31                  | 1.82        | 191  | 0.31                  | 1.80        |      |                       |             |
| 64   | 0.31                  | 1.83        | 128  | 0.32                  | 1.87        | 192  | 0.31                  | 1.79        |      |                       |             |

**Supplementary table 3. Summary of site model analyses on bovine *APOBEC3Z3*.**

| Site | Posterior probability | dN/dS ratio | Site | Posterior probability | dN/dS ratio | Site | Posterior probability | dN/dS ratio | Site | Posterior probability | dN/dS ratio |
|------|-----------------------|-------------|------|-----------------------|-------------|------|-----------------------|-------------|------|-----------------------|-------------|
| 1    | 0.31                  | 2.60        | 65   | 0.33                  | 2.76        | 129  | 0.32                  | 2.75        | 193  | 0.31                  | 2.61        |
| 2    | 0.31                  | 2.66        | 66   | 0.31                  | 2.67        | 130  | 0.31                  | 2.63        | 194  | 0.32                  | 2.69        |
| 3    | 0.31                  | 2.63        | 67   | 0.33                  | 2.78        | 131  | 0.31                  | 2.64        | 195  | 0.32                  | 2.75        |
| 4    | 0.31                  | 2.66        | 68   | 0.31                  | 2.61        | 132  | 0.33                  | 2.77        | 196  | 0.33                  | 2.81        |
| 5    | 0.32                  | 2.74        | 69   | 0.32                  | 2.75        | 133  | 0.32                  | 2.69        | 197  | 0.31                  | 2.63        |
| 6    | 0.33                  | 2.79        | 70   | 0.31                  | 2.66        | 134  | 0.32                  | 2.70        | 198  | 0.32                  | 2.68        |
| 7    | 0.31                  | 2.67        | 71   | 0.31                  | 2.67        | 135  | 0.31                  | 2.66        | 199  | 0.32                  | 2.69        |
| 8    | 0.33                  | 2.82        | 72   | 0.31                  | 2.67        | 136  | 0.32                  | 2.74        | 200  | 0.31                  | 2.63        |
| 9    | 0.31                  | 2.66        | 73   | 0.31                  | 2.66        | 137  | 0.31                  | 2.65        | 201  | 0.31                  | 2.64        |
| 10   | 0.32                  | 2.73        | 74   | 0.31                  | 2.59        | 138  | 0.31                  | 2.67        | 202  | 0.33                  | 2.82        |
| 11   | 0.33                  | 2.79        | 75   | 0.31                  | 2.61        | 139  | 0.31                  | 2.62        | 203  | 0.31                  | 2.67        |
| 12   | 0.31                  | 2.67        | 76   | 0.31                  | 2.61        | 140  | 0.32                  | 2.74        | 204  | 0.32                  | 2.69        |
| 13   | 0.33                  | 2.77        | 77   | 0.32                  | 2.69        | 141  | 0.31                  | 2.64        | 205  | 0.33                  | 2.79        |
| 14   | 0.33                  | 2.79        | 78   | 0.32                  | 2.68        | 142  | 0.31                  | 2.61        | 206  | 0.32                  | 2.75        |
| 15   | 0.33                  | 2.79        | 79   | 0.32                  | 2.73        | 143  | 0.88                  | 7.24        |      |                       |             |
| 16   | 0.31                  | 2.67        | 80   | 0.33                  | 2.80        | 144  | 0.33                  | 2.77        |      |                       |             |
| 17   | 0.33                  | 2.78        | 81   | 0.32                  | 2.75        | 145  | 0.31                  | 2.61        |      |                       |             |
| 18   | 0.32                  | 2.74        | 82   | 0.32                  | 2.75        | 146  | 0.31                  | 2.60        |      |                       |             |
| 19   | 0.33                  | 2.77        | 83   | 0.31                  | 2.66        | 147  | 0.31                  | 2.67        |      |                       |             |
| 20   | 0.32                  | 2.69        | 84   | 0.33                  | 2.77        | 148  | 0.32                  | 2.74        |      |                       |             |
| 21   | 0.33                  | 2.79        | 85   | 0.32                  | 2.75        | 149  | 0.32                  | 2.69        |      |                       |             |
| 22   | 0.31                  | 2.66        | 86   | 0.31                  | 2.61        | 150  | 0.32                  | 2.73        |      |                       |             |
| 23   | 0.32                  | 2.75        | 87   | 0.31                  | 2.61        | 151  | 0.32                  | 2.74        |      |                       |             |
| 24   | 0.31                  | 2.59        | 88   | 0.31                  | 2.64        | 152  | 0.32                  | 2.69        |      |                       |             |
| 25   | 0.31                  | 2.67        | 89   | 0.31                  | 2.59        | 153  | 0.87                  | 7.18        |      |                       |             |
| 26   | 0.31                  | 2.60        | 90   | 0.33                  | 2.82        | 154  | 0.33                  | 2.79        |      |                       |             |
| 27   | 0.32                  | 2.72        | 91   | 0.32                  | 2.74        | 155  | 0.31                  | 2.67        |      |                       |             |
| 28   | 0.32                  | 2.74        | 92   | 0.99                  | 8.10        | 156  | 0.31                  | 2.64        |      |                       |             |
| 29   | 0.33                  | 2.82        | 93   | 0.32                  | 2.74        | 157  | 0.33                  | 2.82        |      |                       |             |
| 30   | 0.32                  | 2.75        | 94   | 0.31                  | 2.59        | 158  | 0.32                  | 2.67        |      |                       |             |
| 31   | 0.32                  | 2.75        | 95   | 0.87                  | 7.19        | 159  | 0.33                  | 2.79        |      |                       |             |
| 32   | 0.99                  | 8.10        | 96   | 0.31                  | 2.61        | 160  | 0.31                  | 2.67        |      |                       |             |
| 33   | 0.32                  | 2.74        | 97   | 0.32                  | 2.69        | 161  | 0.31                  | 2.60        |      |                       |             |
| 34   | 0.31                  | 2.67        | 98   | 0.31                  | 2.61        | 162  | 0.31                  | 2.66        |      |                       |             |
| 35   | 0.31                  | 2.61        | 99   | 0.31                  | 2.65        | 163  | 0.31                  | 2.62        |      |                       |             |
| 36   | 0.32                  | 2.69        | 100  | 0.87                  | 7.21        | 164  | 0.33                  | 2.78        |      |                       |             |
| 37   | 0.32                  | 2.69        | 101  | 0.31                  | 2.64        | 165  | 0.31                  | 2.63        |      |                       |             |
| 38   | 0.33                  | 2.77        | 102  | 0.31                  | 2.64        | 166  | 0.33                  | 2.77        |      |                       |             |
| 39   | 0.31                  | 2.66        | 103  | 0.31                  | 2.67        | 167  | 0.32                  | 2.75        |      |                       |             |
| 40   | 0.31                  | 2.59        | 104  | 0.33                  | 2.77        | 168  | 0.31                  | 2.61        |      |                       |             |
| 41   | 0.32                  | 2.69        | 105  | 0.31                  | 2.64        | 169  | 0.31                  | 2.67        |      |                       |             |
| 42   | 0.32                  | 2.69        | 106  | 0.33                  | 2.78        | 170  | 0.32                  | 2.74        |      |                       |             |
| 43   | 0.32                  | 2.68        | 107  | 0.32                  | 2.74        | 171  | 0.32                  | 2.75        |      |                       |             |
| 44   | 0.31                  | 2.67        | 108  | 0.31                  | 2.61        | 172  | 0.32                  | 2.69        |      |                       |             |
| 45   | 0.33                  | 2.79        | 109  | 0.33                  | 2.79        | 173  | 0.33                  | 2.77        |      |                       |             |
| 46   | 0.33                  | 2.80        | 110  | 0.31                  | 2.67        | 174  | 0.32                  | 2.67        |      |                       |             |
| 47   | 0.33                  | 2.79        | 111  | 0.32                  | 2.69        | 175  | 0.31                  | 2.61        |      |                       |             |
| 48   | 0.31                  | 2.65        | 112  | 0.31                  | 2.59        | 176  | 0.31                  | 2.59        |      |                       |             |
| 49   | 0.31                  | 2.65        | 113  | 0.33                  | 2.77        | 177  | 0.32                  | 2.69        |      |                       |             |
| 50   | 0.32                  | 2.68        | 114  | 0.32                  | 2.69        | 178  | 0.33                  | 2.82        |      |                       |             |
| 51   | 0.31                  | 2.63        | 115  | 0.32                  | 2.72        | 179  | 0.31                  | 2.63        |      |                       |             |
| 52   | 0.31                  | 2.61        | 116  | 0.31                  | 2.63        | 180  | 0.32                  | 2.69        |      |                       |             |
| 53   | 0.31                  | 2.66        | 117  | 0.32                  | 2.74        | 181  | 0.31                  | 2.67        |      |                       |             |
| 54   | 0.31                  | 2.65        | 118  | 0.31                  | 2.67        | 182  | 0.32                  | 2.69        |      |                       |             |
| 55   | 0.32                  | 2.74        | 119  | 0.32                  | 2.72        | 183  | 0.32                  | 2.69        |      |                       |             |
| 56   | 0.31                  | 2.67        | 120  | 0.31                  | 2.67        | 184  | 0.32                  | 2.74        |      |                       |             |
| 57   | 0.31                  | 2.65        | 121  | 0.31                  | 2.64        | 185  | 0.31                  | 2.61        |      |                       |             |
| 58   | 0.32                  | 2.69        | 122  | 0.31                  | 2.66        | 186  | 0.31                  | 2.61        |      |                       |             |
| 59   | 0.32                  | 2.74        | 123  | 0.31                  | 2.63        | 187  | 0.32                  | 2.74        |      |                       |             |
| 60   | 0.31                  | 2.61        | 124  | 0.32                  | 2.72        | 188  | 0.31                  | 2.63        |      |                       |             |
| 61   | 0.32                  | 2.69        | 125  | 0.31                  | 2.59        | 189  | 0.33                  | 2.77        |      |                       |             |
| 62   | 0.99                  | 8.10        | 126  | 0.31                  | 2.62        | 190  | 0.31                  | 2.65        |      |                       |             |
| 63   | 0.32                  | 2.72        | 127  | 0.32                  | 2.74        | 191  | 0.32                  | 2.73        |      |                       |             |
| 64   | 0.31                  | 2.61        | 128  | 0.32                  | 2.73        | 192  | 0.32                  | 2.69        |      |                       |             |

**Supplementary table 4. Primers used for bovine *APOBEC3* and *CYTB* sequencing.<sup>a</sup>**

| Primer name                | Sequences (5' to 3')   | Product (bp) |
|----------------------------|------------------------|--------------|
| Z1-1F                      | agaggactgggtcatcatcg   | 552          |
| Z1-1R                      | tctgacatgtggctcaaagc   |              |
| Z1-2F                      | ggtagtggggtagggctcgt   | 1232         |
| Z1-2R                      | acttcgtcagcacggttcctt  |              |
| Z1-3F                      | aaggaacgtgctgacgaagt   | 925          |
| Z1-3R                      | tggctgggaatgaagatcc    |              |
| Z1-4F                      | ggatcttcattcccagacca   | 1214         |
| Z1-4R                      | tcctctccagggcagtagaa   |              |
| Z2-1F                      | cctacctcataagggccaca   | 744          |
| Z2-1R                      | ggccagttcagaagcaagag   |              |
| Z2-2F                      | tggggattagggtgctacag   | 773          |
| Z2-2R                      | agcaccgagtcttcaccact   |              |
| Z2-3F                      | agaaaagaagggaggggaca   | 730          |
| Z2-3R                      | ccgagaatgtcctcaagctc   |              |
| Z2-4F                      | gcccgtctctacaactcca    | 937          |
| Z2-4R                      | gaaaggccatctgaggacac   |              |
| Z3-1F                      | cacagatctgccaacacag    | 780          |
| Z3-1R                      | actggcatcgatacctggtc   |              |
| Z3-2F                      | ctggtcagccaagaaggaag   | 528          |
| Z3-2R                      | gagctgagacctggaggatg   |              |
| Z3-34F                     | atgtgtgacctctggcctct   | 934          |
| Z3-34R                     | atcaggggaagccacaaagaa  |              |
| Z3-5F                      | ctagtccctgcgttttcagc   | 479          |
| Z3-5R                      | atggcccactgttccagac    |              |
| <i>Bos</i> <i>CYTB</i> Fwd | acaaatcctcacaggcctattc |              |
| <i>Bos</i> <i>CYTB</i> Rev | taggacgtatcctatgaatgct |              |

<sup>a</sup> The primer names are identical to those in Supplementary figure 1.

**Supplementary table 5. Primers used for the construction of bovine APOBEC3Z3 expression plasmids.**

| Primer name                     | Sequences (5' to 3')                                         | Template    | Species                               | Purpose                   |
|---------------------------------|--------------------------------------------------------------|-------------|---------------------------------------|---------------------------|
| btA3Z3-HA Fwd                   | tatatatataaagctgtcctgggagtgctatga                            | cDNA        | Cattle                                | HA-tagged ORF preparation |
| btA3Z3-HA Rev                   | tttttttctcgcagtcgaagcgaatctggaacatcgtatgggtaaatggggccgtaggac | cDNA        | Cattle                                | HA-tagged ORF preparation |
| BGY Z3 exons 1,2 Fwd            | aaacacgatgaatctgctaagagaaattctgtcaagcagcag                   | genomic DNA | Banteng, Gaur and Yak                 | ORF/exon conjugation      |
| BGY Z3 exons 1,2 Rev            | ctgcttgaacagaatttctcttagcagattcatcgtgttctgttccgggagtcacaaac  | genomic DNA | Banteng, Gaur and Yak                 | ORF/exon conjugation      |
| BGY Z3 exons 2,3 Fwd            | gaggctgcttccgcaacaagaagcagcggcatgcagaaattc                   | genomic DNA | Banteng, Gaur and Yak                 | ORF/exon conjugation      |
| BGY Z3 exons 2,3 Rev            | atcttgcagcgcgctgcttctgttgcggaagcagcc                         | genomic DNA | Banteng, Gaur and Yak                 | ORF/exon conjugation      |
| BGY Z3 exons 3,4 Fwd            | ggctgtcatgacccacacagagtttgaagactgtgggaac                     | genomic DNA | Banteng, Gaur and Yak                 | ORF/exon conjugation      |
| BGY Z3 exons 3,4 Rev            | ttcccagcagctctcaaacctgtgtgggtcatgacagcc                      | genomic DNA | Banteng, Gaur and Yak                 | ORF/exon conjugation      |
| BGYA Z3 exons 4,5 Rev           | aattggggccgtaggacacctctggagcc                                | genomic DNA | American bison, Banteng, Gaur and Yak | ORF/exon conjugation      |
| American bison Z3 exons 1,2 Fwd | gactcccgaaccagaaacacgatgaatctgct                             | genomic DNA | American bison                        | ORF/exon conjugation      |
| American bison Z3 exons 1,2 Rev | agattcatcgtgttctgttccgggagtcacaa                             | genomic DNA | American bison                        | ORF/exon conjugation      |
| American bison Z3 exons 2,3 Fwd | gcttccgcaacaagaagcagcggcatgcagaaatt                          | genomic DNA | American bison                        | ORF/exon conjugation      |
| American bison Z3 exons 2,3 Rev | tgcatgccgctgcttctgttgcggaagcagcc                             | genomic DNA | American bison                        | ORF/exon conjugation      |
| American bison Z3 exons 3,4 Fwd | tcatgaccacacagagtttgaagactgtgg                               | genomic DNA | American bison                        | ORF/exon conjugation      |
| American bison Z3 exons 3,4 Rev | agcagctctcaaacctgtgtgggtcatgacag                             | genomic DNA | American bison                        | ORF/exon conjugation      |

**Supplementary table 6. Primers used for the construction of bovine APOBEC3 MRCA expression plasmids.**

| Primer name              | Sequences (5' to 3')                | Template                      | Product                                    |
|--------------------------|-------------------------------------|-------------------------------|--------------------------------------------|
| Yak Z3 I32V Fwd          | ctgctaagagaagtctgttcaagcagc         | Yak APOBEC3Z3, Gaur APOBEC3Z3 | <i>Bos/Bison</i> MRCA, Gaur APOBEC3Z3 V32I |
| Yak Z3 I32V Rev          | gctgctgaacagaactctcttagcag          | Yak APOBEC3Z3, Gaur APOBEC3Z3 | <i>Bos/Bison</i> MRCA, Gaur APOBEC3Z3 V32I |
| BB MRCA P143S Fwd        | ccactggatcaagtcatttaagatggggct      | <i>Bos/Bison</i> MRCA         | BCGZ MRCA                                  |
| BB MRCA P143S Rev        | agccccatctaaatgacttgatccagtg        | <i>Bos/Bison</i> MRCA         | BCGZ MRCA                                  |
| Gaur APOBEC3Z3 P62L Fwd  | cagctgaagcagcttaatgacttgacgc        | Gaur APOBEC3Z3                | Gaur APOBEC3Z3 P62L                        |
| Gaur APOBEC3Z3 P62L Rev  | gcgtaagtcattaagctgcttcagctg         | Gaur APOBEC3Z3                | Gaur APOBEC3Z3 P62L                        |
| Gaur APOBEC3Z3 N92D Fwd  | gatcaactcactggatctgaaccgga          | Gaur APOBEC3Z3                | Gaur APOBEC3Z3 N92D                        |
| Gaur APOBEC3Z3 N92D Rev  | tccggttcagatccagtgagttgatc          | Gaur APOBEC3Z3                | Gaur APOBEC3Z3 N92D                        |
| Gaur APOBEC3Z3 R95P Fwd  | ctgaatctgaacccgagccagagctaca        | Gaur APOBEC3Z3                | Gaur APOBEC3Z3 R95P                        |
| Gaur APOBEC3Z3 R95P Rev  | tgtagctctggctcgggttcagattcag        | Gaur APOBEC3Z3                | Gaur APOBEC3Z3 R95P                        |
| Gaur APOBEC3Z3 T100K Fwd | cggagccagagctacaaaatcatctgctatatcac | Gaur APOBEC3Z3                | Gaur APOBEC3Z3 T100K                       |
| Gaur APOBEC3Z3 T100K Rev | gtgatatagcagatgattttgtagctctggctccg | Gaur APOBEC3Z3                | Gaur APOBEC3Z3 T100K                       |



**Supplementary table 7. Primers used for the construction of expression plasmids for BIV/JDV Vif derivatives.**

| Primer name         | Sequences (5' to 3')                                          | Product         |
|---------------------|---------------------------------------------------------------|-----------------|
| BIV Vif SLQ/AAA Fwd | gcacacctagacacgcccgcagactggccgccctg                           | BIV Vif SLQ/AAA |
| BIV Vif SLQ/AAA Rev | cagggcgccagctctggcgccgctgtctaggtgtgc                          | BIV Vif SLQ/AAA |
| JDV Vif SLQ/AAA Fwd | cacaccaaacctcacgccgccagactggccggcctg                          | JDV Vif SLQ/AAA |
| JDV Vif SLQ/AAA Rev | caggccggccagctctggcgccgctgagggttggtgtg                        | JDV Vif SLQ/AAA |
| Vif JB Fwd          | gtcgacgttaacgcatgc                                            | Vif JB          |
| Vif JB Rev          | ccagaacaggtccagctc                                            | Vif JB          |
| Vif JB in-Fwd       | ctggacctgttctgggtgcgctacacctgtgc                              | Vif JB          |
| Vif JB in-Rev       | atgcttaacgtcgaactcattgtcgtcgtctcc                             | Vif JB          |
| Vif JBB Fwd         | gcggcagaccgagtacag                                            | Vif JBB         |
| Vif JBB Rev         | agcttaagttaaacgctagcgg                                        | Vif JBB         |
| Vif JBB in-Fwd      | agcgttaaaccttaagcttggtaccgagctcggatc                          | Vif JBB         |
| Vif JBB in-Rev      | gtactcggctctgccacgaactcccactctggg                             | Vif JBB         |
| Vif BJB Fwd         | ctgcggtactgcagctgc                                            | Vif BJB         |
| Vif BJB Rev         | cacgaactcccactctggg                                           | Vif BJB         |
| Vif BJB in-Fwd      | cagatgggagttcgtgatgaacgacctgtacagc                            | Vif BJB         |
| Vif BJB in-Rev      | gctgcagtaccgcagccagaacaggtccagctc                             | Vif BJB         |
| Vif BJB1 Fwd        | gacctgtacagccagaccgctgtgtgcggaag                              | Vif BJB1        |
| Vif BJB1 Rev        | ctggctgtacaggtcgtcatcacgaactcccactctgggg                      | Vif BJB1        |
| Vif BJB2 Fwd        | tcatcacctaccgctacgccatctggaagagagtgtg                         | Vif BJB2        |
| Vif BJB2 Rev        | gcggtaggtgatgatgatttctcttctgcagctctggcggtcatgctgtactcggctgccc | Vif BJB2        |
| Vif BJB3 Fwd        | gagtggaagatccagacaggcttcaccgacccc                             | Vif BJB3        |
| Vif BJB3 Rev        | ctggatcttcactctctggcccacacggcgtactggttaggtcagcaccagcttg       | Vif BJB3        |
| Vif BJB4 Fwd        | ggacctgggctacctgatgacctgcccggcac                              | Vif BJB4        |
| Vif BJB4 Rev        | caggtagcccaggtccaggaagccggctctcgtatggtccacactctctcc           | Vif BJB4        |
